# Supplementary material for: Brain atrophy and clinical characteristics predicting SDMT performance in multiple sclerosis: A 10-year follow-up study
Source: PubMed Central journal article supplement (PMC7876764; doi:10.1177/2055217321992394), 2021-02-08
Supplement: sj-pdf-1-mso-10.1177_2055217321992394.pdf [file sj-pdf-1-mso-10.1177_2055217321992394.pdf]

**Supplementary table 1.** Prediction of clinically relevant reduction in SDMT during 5 years from baseline (31 cases, 35 non-cases)

| Baseline predictor   | Univariable          |              |      |                    | Multivariable                            |              |      |                    |       |                 |
|----------------------|----------------------|--------------|------|--------------------|------------------------------------------|--------------|------|--------------------|-------|-----------------|
|                      | OR (95% CI)          | p            | C    | R <sup>2</sup> (%) | OR (95% CI)                              | p            | C    | R <sup>2</sup> (%) | ΔC    | ΔR <sup>2</sup> |
|                      |                      |              |      |                    | <i>Best model clin/dem</i>               |              |      |                    |       |                 |
| Age                  | 1.45 (0.85, 2.45)    | 0.17         | 0.60 | 3.9                |                                          |              |      |                    |       |                 |
| Sex (female)         | 0.63 (0.23, 1.77)    | 0.39         | 0.55 | 1.5                |                                          |              |      |                    |       |                 |
| Center (SUS)         | 6.07 (2.08, 17.66)   | <b>0.001</b> | 0.71 | 22.3               | 8.71 (2.55, 29.78)                       | <b>0.001</b> | 0.81 | 36.9               |       |                 |
| Education (high)     | 0.78 (0.28, 2.23)    | 0.65         | 0.53 | 0.4                |                                          |              |      |                    |       |                 |
| Log disease duration | 1.62 (0.82, 3.19)    | 0.16         | 0.60 | 4.0                | 2.03 (0.91, 4.53)                        | 0.083        |      |                    |       |                 |
| MS type progressive  | 1.41 (0.42, 4.76)    | 0.58         | 0.53 | 0.6                |                                          |              |      |                    |       |                 |
| EDSS                 | 1.62 (1.06, 2.47)    | <b>0.026</b> | 0.64 | 10.9               | 1.72 (1.03, 2.88)                        | <b>0.037</b> |      |                    |       |                 |
| SDMT                 | 1.00 (0.97, 1.04)    | 0.90         | 0.51 | 0.0                |                                          |              |      |                    |       |                 |
|                      |                      |              |      |                    | <i>When added to best model clin/dem</i> |              |      |                    |       |                 |
| Whole brain          | 0.989 (0.981, 0.996) | <b>0.003</b> | 0.72 | 21.0               | 0.993 (0.984, 1.002)                     | 0.11         | 0.83 | 40.9               | 0.02  | 4.0             |
| Grey matter          | 0.987 (0.977, 0.998) | <b>0.015</b> | 0.67 | 13.0               | 0.991 (0.978, 1.004)                     | 0.17         | 0.82 | 39.9               | 0.01  | 3.0             |
| White matter         | 0.980 (0.966, 0.994) | <b>0.006</b> | 0.70 | 18.5               | 0.989 (0.972, 1.006)                     | 0.20         | 0.82 | 39.4               | 0.01  | 2.5             |
| Ventricular          | 1.00 (0.98, 1.03)    | 0.80         | 0.51 | 0.1                | 1.01 (0.98, 1.05)                        | 0.40         | 0.81 | 38.0               | 0.00  | 1.1             |
| Cortical             | 0.980 (0.967, 0.994) | <b>0.004</b> | 0.70 | 19.6               | 0.988 (0.973, 1.004)                     | 0.14         | 0.83 | 40.3               | 0.02  | 3.4             |
| T2 LV                | 1.05 (1.00, 1.10)    | <b>0.032</b> | 0.67 | 10.0               | 1.07 (1.00, 1.14)                        | <b>0.043</b> | 0.84 | 43.5               | 0.03  | 6.6             |
| T1 LV                | 1.10 (1.01, 1.21)    | <b>0.037</b> | 0.70 | 10.4               | 1.11 (0.98, 1.26)                        | 0.10         | 0.83 | 41.4               | 0.02  | 4.5             |
| Subcortical          | 0.94 (0.86, 1.03)    | 0.19         | 0.59 | 3.6                | 0.99 (0.88, 1.12)                        | 0.88         | 0.80 | 37.0               | -0.01 | 0.1             |
| Caudate              | 0.89 (0.53, 1.51)    | 0.67         | 0.56 | 0.4                | 1.35 (0.69, 2.64)                        | 0.38         | 0.81 | 38.1               | 0.00  | 1.2             |
| Putamen              | 0.87 (0.59, 1.27)    | 0.47         | 0.53 | 1.1                | 0.97 (0.58, 1.62)                        | 0.90         | 0.80 | 37.0               | -0.01 | 0.1             |
| Thalamus             | 0.76 (0.57, 1.01)    | 0.059        | 0.65 | 7.5                | 0.88 (0.62, 1.26)                        | 0.49         | 0.81 | 37.6               | 0.00  | 0.7             |
| Pallidus             | 1.10 (0.38, 3.19)    | 0.86         | 0.50 | 0.1                | 1.46 (0.38, 5.62)                        | 0.59         | 0.81 | 37.4               | 0.00  | 0.5             |
| Hippocampus          | 0.77 (0.49, 1.21)    | 0.26         | 0.57 | 2.7                | 0.93 (0.54, 1.62)                        | 0.81         | 0.80 | 37.0               | -0.01 | 0.1             |
| Amygdala             | 0.29 (0.09, 0.95)    | <b>0.040</b> | 0.63 | 9.2                | 0.75 (0.18, 3.07)                        | 0.69         | 0.81 | 37.2               | 0.00  | 0.3             |

Legend: MS = Multiple Sclerosis (progressive=primary and secondary progressive combined); EDSS = Expanded Disability Status Scale; SDMT = Symbol Digit Modalities Test; LV = Lesion Volume; OR = Odds Ratio; CI = Confidence Interval.

Effect estimates from logistic regression analysis with reduction in SDMT greater than 4 points during 5 years (yes/no) as outcome, and baseline variables as predictors. An OR>1 means that a higher value of the predictor is associated with a greater odds of having a clinically significant decline in CPS. Predictive power of each model is estimated by the concordance index (C) and by Nagelkerke R<sup>2</sup>, and the contribution of each predictor by the change in these statistics (ΔC and ΔR<sup>2</sup>, respectively). Bold values denotes statistical significance at the p< 0.05 level.

**Supplementary table 2.** Prediction of clinically relevant reduction in SDMT during 10 years from baseline (13 cases, 37 non-cases)

| Predictor            | Univariable          |              |      |                    |
|----------------------|----------------------|--------------|------|--------------------|
|                      | OR (95% CI)          | p            | C    | R <sup>2</sup> (%) |
| Age                  | 1.24 (0.61, 2.50)    | 0.55         | 0.55 | 1.1                |
| Sex (female)         | 0.44 (0.11, 1.73)    | 0.24         | 0.58 | 3.9                |
| Center (SUS)         | 1.69 (0.44, 6.39)    | 0.44         | 0.56 | 1.7                |
| Education (high)     | 1.30 (0.35, 4.84)    | 0.69         | 0.53 | 0.5                |
| Log disease duration | 1.11 (0.48, 2.59)    | 0.80         | 0.62 | 0.2                |
| MS type progressive  | 1.92 (0.39, 9.49)    | 0.42         | 0.55 | 1.8                |
| EDSS                 | 1.00 (0.62, 1.61)    | 1.00         | 0.51 | 0.0                |
| SDMT                 | 1.03 (0.97, 1.08)    | 0.33         | 0.59 | 2.8                |
| Whole brain          | 0.997 (0.989, 1.005) | 0.46         | 0.58 | 1.6                |
| Grey matter          | 0.992 (0.981, 1.004) | 0.19         | 0.60 | 5.3                |
| White matter         | 1.003 (0.988, 1.017) | 0.72         | 0.50 | 0.4                |
| Ventricular          | 0.999 (0.970, 1.028) | 0.92         | 0.51 | 0.0                |
| Cortical             | 0.992 (0.978, 1.006) | 0.24         | 0.60 | 4.3                |
| T2 LV                | 1.05 (1.00, 1.10)    | <b>0.044</b> | 0.68 | 12.0               |
| T1 LV                | 1.14 (1.01, 1.29)    | <b>0.037</b> | 0.72 | 12.9               |
| Subcortical          | 0.95 (0.84, 1.07)    | 0.41         | 0.57 | 2.0                |
| Caudate              | 0.97 (0.48, 1.95)    | 0.93         | 0.52 | 0.0                |
| Putamen              | 0.83 (0.50, 1.39)    | 0.49         | 0.54 | 1.4                |
| Thalamus             | 0.85 (0.59, 1.23)    | 0.39         | 0.59 | 2.2                |
| Pallidus             | 0.61 (0.14, 2.71)    | 0.51         | 0.55 | 1.3                |
| Hippocampus          | 0.75 (0.42, 1.36)    | 0.35         | 0.44 | 2.6                |
| Amygdala             | 0.63 (0.15, 2.66)    | 0.53         | 0.51 | 1.2                |

Legend: MS = Multiple Sclerosis (progressive=primary and secondary progressive combined); EDSS = Expanded Disability Status Scale; SDMT = Symbol Digit Modalities Test; LV = Lesion Volume; OR = Odds Ratio; CI = Confidence Interval.

Effect estimates from logistic regression analysis with reduction in SDMT greater than 4 points during 5 years (yes/no) as outcome, and baseline variables as predictors. An OR>1 means that a higher value of the predictor is associated with a greater odds of having a clinically significant decline in CPS. Predictive power of each model is estimated by the concordance index (C) and by Nagelkerke R<sup>2</sup>. Bold values denotes statistical significance at the p< 0.05 level.
